# Supplementary material
Source: Springer Nature journal article supplement (https://www.springermedizin.de/resource/supplementary/12933_2011_510_MOESM5_ESM.pdf/9538616)
Supplement: MOESM5 [file 9538616]

**A**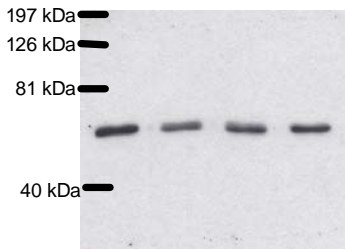**B**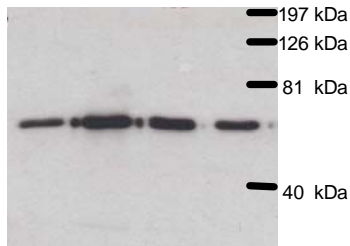

Insulin (pmol/L)

0 170  $1.7 \times 10^{-4}$   $1.7 \times 10^{-6}$ 0 170  $1.7 \times 10^{-4}$   $1.7 \times 10^{-6}$ **C**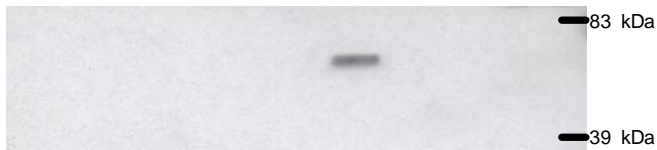

Insulin (pmol/L)

170  $1.7 \times 10^{-4}$   $1.7 \times 10^{-6}$  0170  $1.7 \times 10^{-4}$   $1.7 \times 10^{-6}$ 

Wortmannin (nmol/L)

← 1000 →

← 300 →
